# Supplementary material for: Vitamin D Intake in Slovenian Adolescents, Adults, and the Elderly Population
Source: MDPI journal article supplement (doi:10.3390/nu13103528), 2021-10-08
Supplement: s1 [file s1]

**Supplementary Table S1.** Patterns of observed food consumption related to vitamin D diet: comparison of true consumers with the use of FPQ data and 24-h dietary recalls

| Food categories                                | Adolescents (10–17 Years Old) |                                          | Adults (18–64 Years Old)  |                                          | Elderly (65–74 Years Old) |                                          |
|------------------------------------------------|-------------------------------|------------------------------------------|---------------------------|------------------------------------------|---------------------------|------------------------------------------|
|                                                | True consumers<br>FPQ (%)     | Consumers in 24 h<br>dietary recalls (%) | True consumers<br>FPQ (%) | Consumers in 24 h<br>dietary recalls (%) | True consumers<br>FPQ (%) | Consumers in 24 h<br>dietary recalls (%) |
| Sea fish                                       | 75.8                          | 65.4                                     | 80.8                      | 72.8                                     | 73.8                      | 68.8                                     |
| Beef, veal and pork meat                       | 91.5                          | 98.3                                     | 95.3                      | 96.4                                     | 96.6                      | 99.3                                     |
| Fish cans and pate                             | 73.1                          | 67.5                                     | 75.6                      | 66.8                                     | 72.1                      | 71.4                                     |
| Sweetened flakes                               | 68.2                          | 69.4                                     | 24.2                      | 22.5                                     | 8.17                      | 1.20                                     |
| Sausages, hot dogs and meat pate               | 94.2                          | 95.3                                     | 86.3                      | 87.9                                     | 88.9                      | 90.9                                     |
| Cheese and cheese spreads                      | 88.9                          | 95.5                                     | 91.5                      | 94.0                                     | 90.1                      | 91.4                                     |
| Chicken meat                                   | 98.1                          | 98.3                                     | 96.4                      | 97.0                                     | 97.8                      | 98.3                                     |
| Milk                                           | 92.7                          | 96.6                                     | 82.7                      | 85.7                                     | 83.7                      | 87.5                                     |
| Mushrooms                                      | 57.7                          | 64.7                                     | 77.2                      | 79.4                                     | 79.6                      | 73.8                                     |
| Cakes and rolls                                | 89.5                          | 84.0                                     | 80.8                      | 58.0                                     | 73.0                      | 46.4                                     |
| Milk ice-cream and milk pudding                | 93.8                          | 80.6                                     | 75.8                      | 37.1                                     | 63.5                      | 7.69                                     |
| Butter                                         | 85.3                          | 85.9                                     | 82.1                      | 85.4                                     | 83.9                      | 86.3                                     |
| Biscuits and wafers                            | 94.2                          | 90.4                                     | 81.3                      | 82.1                                     | 72.8                      | 72.8                                     |
| Margarine                                      | 54.0                          | 65.8                                     | 53.2                      | 53.0                                     | 45.2                      | 48.6                                     |
| Croissants and similar products                | 90.8                          | 92.1                                     | 82.9                      | 51.7                                     | 80.1                      | 0.0                                      |
| Pasta                                          | 99.2                          | 94.7                                     | 96.7                      | 98.4                                     | 96.9                      | 95.2                                     |
| Soya drinks                                    | 12.2                          | 7.26                                     | 7.42                      | 3.57                                     | 4.81                      | 1.92                                     |
| Soft and hard yogurts and curd cheese          | 90.8                          | 92.1                                     | 92.0                      | 91.8                                     | 90.4                      | 90.1                                     |
| Ready and half-ready meals                     | 55.3                          | 51.9                                     | 47.3                      | 46.4                                     | 28.7                      | 0.00                                     |
| Eggs*                                          |                               | 98.5                                     |                           | 100                                      |                           | 100                                      |
| Pancakes*                                      |                               | 99.8                                     |                           | 87.9                                     |                           | 97.1                                     |
| Lard and cracklings                            | 57.9                          | 41.0                                     | 71.2                      | 45.9                                     | 78.1                      | 31.7                                     |
| Probiotic yogurts and other probiotic products | 44.6                          | 39.7                                     | 48.6                      | 34.3                                     | 28.7                      | 28.2                                     |
| Drinks with added milk*                        |                               | 25.4                                     |                           | 77.5                                     |                           | 70.0                                     |
| Rise and other plant-based drinks              | 13.7                          | 3.63                                     | 11.3                      | 0.55                                     | 5.5                       | 0                                        |
| White and halfwhite bread                      | 95.3                          | 70.7                                     | 84.9                      | 15.9                                     | 76.7                      | 27.6                                     |
| Mixed and whole wheat bread                    | 85.5                          | 50.2                                     | 88.5                      | 0.00                                     | 89.7                      | 0.00                                     |
| Milk (cream)*                                  |                               | 94.7                                     |                           | 86.8                                     |                           | 97.6                                     |

Notes: FPQ: food propensity questionnaire. \*Food groups for which FPQ data were not collected.

**Supplementary Table S2.** Patterns of observed FPQ food consumption related to vitamin D diet in subjects with intakes lower and higher than 2.5 µg vitamin D per day

| FFQ categories                        | Proportions of food consumers based on FPQ data; % (95% CI) |                  |                   |                  |                  |                  |                   |                  |                  |
|---------------------------------------|-------------------------------------------------------------|------------------|-------------------|------------------|------------------|------------------|-------------------|------------------|------------------|
|                                       | Adolescents (10-17)                                         |                  |                   | Adults (18-64)   |                  |                  | Elderly (65-74)   |                  |                  |
|                                       | All                                                         | <2.5 µg/day      | >2.5 µg/day       | All              | <2.5 µg/day      | >2.5 µg/day      | All               | <2.5 µg/day      | >2.5 µg/day      |
| Sea fish                              | 78.5 (73.5-82.8)                                            | 72.7 (65.7-78.7) | 85.6 (78.5-90.6)  | 83.1 (78.6-86.7) | 74.5 (67.0-80.8) | 90.3 (84.9-93.9) | 78.8 (73.0-83.6)  | 72.3 (62.8-80.0) | 89.0 (82.8-93.1) |
| Beef, veal, and pork meat             | 92.8 (89.9-94.9)                                            | 89.6 (85.0-92.9) | 96.7 (93.1-98.4)  | 95.1 (92.2-97.0) | 92.8 (87.6-95.9) | 97.1 (92.8-98.8) | 97.4 (95.4-98.5)  | 96.3 (93.1-98.1) | 99.0 (96.2-99.8) |
| Fish cans and pate                    | 75.4 (65.0-80.1)                                            | 71.6 (64.5-77.7) | 80.0 (71.4-86.5)  | 77.9 (73.0-82.2) | 69.9 (61.9-76.8) | 84.7 (78.5-89.4) | 71.5 (62.79-79.0) | 65.7 (54.8-75.2) | 80.7 (59.1-92.3) |
| Sweetened flakes                      | 70.9 (65.2-76.1)                                            | 63.9 (56.2-71.1) | 79.5 (71.1-85.9)  | 25.6 (20.8-31.1) | 24.8 (18.2-32.8) | 26.3 (19.8-34.2) | 7.6 (4.9-11.9)    | 9.9 (5.6-16.8)   | 4.1 (2.0-8.1)    |
| Sausages, hot dogs, and meat pate     | 94.6 (91.4-96.7)                                            | 96.5 (93.7-98.1) | 92.2 (85.5-96.0)  | 85.9(81.5-89.3)  | 79.6 (72.1-85.4) | 91.2 (85.7-94.7) | 89.7 (85.6-92.7)  | 86.5 (80.1-91.1) | 94.6 (89.3-97.3) |
| Cheese and cheese spreads             | 86.5 (78.4-91.9)                                            | 83.8 (70.1-91.9) | 89.9 (82.5-94.4)  | 90.9 (86.6-93.9) | 88.2 (81.7-92.6) | 93.2 (86.5-96.7) | 91.5 (87.9-94.2)  | 88.0 (82.0-92.3) | 97.0 (93.3-98.7) |
| Chicken meat                          | 98.2 (96.4-99.1)                                            | 97.9 (95.0-99.2) | 98.5 (95.8-99.5)  | 96.9 (93.8-97.9) | 95.3 (90.7-97.7) | 97.3 (93.6-98.9) | 97.1 (92.4-99.0)  | 95.6 (87.9-98.5) | 99.6 (97.0-99.9) |
| Milk                                  | 94.3 (91.2-96.2)                                            | 94.1 (90.4-96.4) | 94.6 (89.9-97.2)  | 84.4 (79.9-88.0) | 80.3 (73.0-86.1) | 87.7 (82.0-91.8) | 75.2 (60.4-85.8)  | 71.8 (51.4-86.0) | 80.6 (59.2-92.2) |
| Mushrooms                             | 57.3 (50.0-64.4)                                            | 49.1 (40.5-57.6) | 67.5 (57.2-76.3)  | 76.4 (71.0-81.1) | 73.2 (64.1-80.1) | 79.2 (71.9-85.0) | 73.3 (60.0-83.4)  | 69.0 (50.0-83.2) | 80.0 (66.8-88.8) |
| Cakes and rolls                       | 89.8 (85.9-92.7)                                            | 89.9 (85.2-93.2) | 89.8 (82.6-94.2)  | 81.2 (76.4-85.2) | 75.6 (67.7-82.0) | 85.9 (79.8-90.4) | 68.3 (55.5-78.9)  | 66.7 (48.6-80.9) | 70.9 (53.7-83.7) |
| Milk ice-cream and milk pudding       | 95.3 (93.1-96.7)                                            | 94.4 (91.0-96.6) | 96.5 (93.3-98.2)  | 77.7 (72.7-82.0) | 71.0 (63.0-78.0) | 83.3 (77.2-88.1) | 58.2 (47.2-68.5)  | 58.0 (42.8-71.8) | 58.6 (43.5-72.2) |
| Butter                                | 84.4 (79.4-88.4)                                            | 82.8 (75.9-88.0) | 86.5 (78.3-91.9)  | 82.3 (77.6-86.2) | 78.6 (71.0-84.7) | 85.4 (79.2-90.0) | 87.2 (82.9-90.6)  | 85.0 (78.5-89.8) | 90.6 (84.4-94.5) |
| Biscuits and wafers                   | 95.2 (92.9-96.8)                                            | 94.5 (91.0-96.8) | 96.1 (92.4-98.0)  | 82.1 (77.3-86.0) | 77.6 (69.9-83.7) | 85.9 (79.6-90.4) | 77.1 (71.0-82.2)  | 75.7 (67.0-82.7) | 79.3 (70.6-85.9) |
| Margarine                             | 53.6 (46.3-60.8)                                            | 50.9 (42.2-59.6) | 56.9 (45.4-67.8)  | 48.3 (42.5-54.1) | 44.8 (36.7-53.3) | 51.2 (43.2-59.1) | 41.8 (33.4-50.6)  | 43.8 (32.1-56.3) | 38.5 (28.0-50.2) |
| Croissants and similar products       | 90.2 (85.8-93.4)                                            | 89.1 (82.6-93.3) | 91.6 (84.7-95.6)  | 84.4 (80.0-88.0) | 78.2 (70.8-84.2) | 89.6 (84.1-93.4) | 83.8 (78.9-87.8)  | 81.3 (73.8-87.0) | 87.9 (81.1-92.4) |
| Pasta                                 | 99.4 (98.4-99.8)                                            | 99.6 (98.2-99.9) | 99.3 (96.2-99.9)  | 96.6 (93.6-98.2) | 96.3 (90.9-98.6) | 96.8 (92.7-98.6) | 97.4 (95.2-98.6)  | 97.1 (94.0-98.6) | 97.8 (93.5-99.3) |
| Soya drinks                           | 11.8 (8.5-16.1)                                             | 12.4 (7.9-18.9)  | 11.13 (6.95-17.4) | 7.5 (4.97-.11.1) | 7.04 (3.68-13.1) | 7.85 (4.6-13.0)  | 4.07 (2.47-6.63)  | 2.70 (1.22-5.86) | 6.21 (3.28-11.5) |
| Soft and hard yogurts and curd cheese | 91.2 (87.8-93.8)                                            | 90.2 (85.5-93.4) | 92.5 (86.6-95.9)  | 92.6 (89.2-94.9) | 88.5 (82.5-92.7) | 96.0 (91.8-98.1) | 93.6 (90.7-95.6)  | 93.5 (89.8-95.9) | 93.6 (88.0-96.7) |
| Ready and half-ready meals            | 56.2 (48.9-63.2)                                            | 51.4 (42.6-60.1) | 62.0 (51.1-71.8)  | 49.8 (44.0-55.6) | 44.1 (35.8-52.8) | 54.7 (46.7-62.5) | 30.1 (23.1-38.2)  | 27.9 (19.5-38.2) | 33.6 (22.7-46.7) |

Notes: FPQ: food propensity questionnaire
